# Supplementary material for: Chemogenetic stimulation of hippocampal adult-born neurons improves long-term memory accuracy
Source: Research Square preprint supplement (doi:10.21203/rs.3.rs-613256/v1), 2021-06-11
Supplement: Supplementary file 1 [file 6de8b55caa3ca3e9dd428b0d.pdf]

| Figure | Panel                 | Statistical test                     | effects                     | statistic                | p-value |
|--------|-----------------------|--------------------------------------|-----------------------------|--------------------------|---------|
| Fig.1  | <b>b</b><br>(D6-Test) | Two-way ANOVA<br>(repeated measures) | No effect of group          | F(1,15)=0.5361           | 0.4754  |
|        |                       |                                      | No effect of time           | F(1,15)=1.273            | 0.277   |
|        |                       |                                      | No interaction              | F(1,15)=2.96             | 0.1059  |
|        | <b>c</b>              | Two-way ANOVA<br>(repeated measures) | Significant effect of group | F(1,15)=5.233            | 0.0371  |
|        |                       |                                      | Significant effect of zone  | F(1,15)=11.66            | 0,0038  |
|        |                       |                                      | Significant interaction     | F(1,15)=7.732            | 0,0140  |
|        | <b>d</b>              | Two-way ANOVA<br>(repeated measures) | No effect of group          | F(1,15)=2.762            | 0.1173  |
|        |                       |                                      | Significant effect of zone  | F(1,15)=12.60            | 0,0029  |
|        |                       |                                      | Significant interaction     | F(1,15)=7.145            | 0.0174  |
| Fig.2  | <b>b</b>              | Unpaired t-test                      |                             | t <sub>6</sub> = 0.07    | 0.9451  |
|        | <b>d</b>              | Unpaired t-test                      |                             | t <sub>3</sub> = 54,9    | <0.0001 |
|        | <b>g</b>              | Paired t-test                        |                             | RP t <sub>3</sub> =1.016 | 0.3845  |
|        |                       |                                      |                             | AP t <sub>3</sub> =0.42  | 0.7029  |
|        | <b>h</b>              | Paired t-test                        |                             | RP t <sub>7</sub> =3.22  | 0.0146  |
|        |                       |                                      |                             | AP t <sub>7</sub> =3.51  | 0.0098  |
| Fig.3  | <b>b</b><br>(D6-Test) | Two-way ANOVA<br>(repeated measures) | No effect of group          | F(1,24)=3.566            | 0.0711  |
|        |                       |                                      | Significant effect of time  | F(1,24)=5.41             | 0.0228  |
|        |                       |                                      | No interaction              | F(1,24)=0.2604           | 0.6145  |
|        | <b>c</b>              | Two-way ANOVA<br>(repeated measures) | Significant effect of group | F(1,24)=8.374            | 0.0080  |
|        |                       |                                      | Significant effect of zone  | F(1,24)=10.26            | 0.0038  |
|        |                       |                                      | Significant interaction     | F(1,24)=6.9              | 0.0148  |
|        | <b>d</b>              | Two-way ANOVA<br>(repeated measures) | No effect of group          | F(1,24)=1.922            | 0.1784  |
|        |                       |                                      | Significant effect of zone  | F(1,24)=4.458            | 0.0453  |
|        |                       |                                      | Significant interaction     | F(1,24)=4.326            | 0.0484  |
| Fig.4  | <b>b</b><br>(D6-Test) | Two-way ANOVA<br>(repeated measures) | No effect of group          | F(1,17)=0.017            | 0.8975  |
|        |                       |                                      | Significant effect of time  | F(1,17)=5.993            | 0.0262  |
|        |                       |                                      | No interaction              | F(1,17)=2.579            | 0.1267  |

|              |                       |                                      |                            |                         |         |
|--------------|-----------------------|--------------------------------------|----------------------------|-------------------------|---------|
|              | <b>c</b>              | Two-way ANOVA<br>(repeated measures) | No effect of group         | F(1,17)=0.01755         | 0.8962  |
|              |                       |                                      | Significant effect of zone | F(1,17)=14.63           | 0.0014  |
|              |                       |                                      | No interaction             | F(1,17)=2.155           | 0.1603  |
|              | <b>d</b>              | Two-way ANOVA<br>(repeated measures) | No effect of group         | F(1,17)=0.7295          | 0.4049  |
|              |                       |                                      | Significant effect of zone | F(1,17)=16.87           | 0.0007  |
|              |                       |                                      | No interaction             | F(1,17)=1.603           | 0.2225  |
| <b>Fig.5</b> | <b>b</b><br>(D6-Test) | Two-way ANOVA<br>(repeated measures) | No effect of group         | F(1,23)=0.4212          | 0.5228  |
|              |                       |                                      | No effect of time          | F(1,23)=0.5339          | 0.4723  |
|              |                       |                                      | No interaction             | F(1,23)=0.3263          | 0.5734  |
|              | <b>c</b>              | Two-way ANOVA<br>(repeated measures) | No effect of group         | F(1,23)=0.01688         | 0.8993  |
|              |                       |                                      | Significant effect of zone | F(1,23)=4.902           | 0.037   |
|              |                       |                                      | No interaction             | F(1,23)=0.03532         | 0.8526  |
|              | <b>d</b>              | Two-way ANOVA<br>(repeated measures) | No effect of group         | F(1,23)=0.0038          | 0.9511  |
|              |                       |                                      | No effect of zone          | F(1,23)=2.538           | 0.1248  |
|              |                       |                                      | No interaction             | F(1,23)=0.0817          | 0.777   |
| <b>Fig.6</b> | <b>c</b>              | Two-way ANOVA<br>(repeated measures) | No effect of group         | F(2,15)=0.1346          | 0.7188  |
|              |                       |                                      | Significant effect of time | F(2,30)=29.12           | <0.0001 |
|              |                       |                                      | No interaction             | F(2,30)=0.01494         | 0.9852  |
|              | <b>d</b>              | Unpaired t-test                      |                            | t <sub>15</sub> = 2.298 | 0.0363  |

Table S1: Statistical analyses for each figure: From left to right : figure number, panel, statistical test used, effects analysed, F or t value for Anova or t test, value of probability (p) for significance.

|                           |                   |                                  |
|---------------------------|-------------------|----------------------------------|
| <i>PCR primers</i>        | Forward (5'-3')   | TATATGGATCCATGACCTTGACAGTAACAGTA |
|                           | Reverse (5'-3')   | TATATGGATCCCTACAAGGCCTGCTCCGGC   |
| <i>Sequencing primers</i> | Forward 1 (5'-3') | CCTTCTCCCTCTCCAGCCT              |
|                           | Forward 2 (5'-3') | CTATGGGCTCCTGCCATCTT             |

Table S2: PCR primers used to clone rM3D (G<sub>s</sub>) into CAG-IRES-GFP and primers used to sequence the resulting construct CAG-G<sub>s</sub>-IRES-GFP.
